# Supplementary material for: Convenient synthesis of s-triazine based urea derivatives via a palladium catalyzed C–N coupling reaction
Source: Royal Society of Chemistry journal article supplement (doi:10.1039/c3ra40490k), 2013-01-01
Supplement: c3ra40490k.pdf [file c3ra40490k.pdf]

**Supplementary Information for**  
**Convenient synthesis of s-triazine based urea derivatives via palladium**  
**catalyzed C-N coupling reaction**

**Jignesh P. Dalvadi, Poojan K. Patel and Kishor H. Chikhaliya\***

*\*Department of Chemistry,*

*School of Science, Gujarat University,*

*Ahmedabad 380009, Gujarat, India*

Chikhaliya\_kh@yahoo.com

**Contents:**

|                                                             |             |
|-------------------------------------------------------------|-------------|
| <b>1. Experimental .....</b>                                | <b>2-8</b>  |
| <b>2. <sup>1</sup>H and <sup>13</sup>C NMR Spectra.....</b> | <b>9-21</b> |

## 1. Experimental

### 1.1 Reagents

All reactions were carried out under a nitrogen atmosphere. Air- and moisture-sensitive solvents and solutions were transferred via syringe or stainless steel cannula. All chemicals were purchased from sigma Aldrich, merck and fluka. Solvents used were of analytical grade. Anhydrous cesium carbonate was stored in a nitrogen-filled glovebox, ground and was taken out in small quantities and stored in a desiccator. Aryl ureas (1a-13a) were prepared by known methods<sup>1</sup>. 1a<sup>2</sup>, 1b<sup>3</sup>, 1c<sup>2, 3</sup>, 1d<sup>2, 4</sup> and 1e were synthesized using literature procedures. All reactions were routinely checked by TLC. TLC was performed on aluminum-backed silica gel plates (silica gel 60 F<sub>254</sub> grade, Merck DC) with spots visualized by UV light. Column chromatography was performed on silica gel LC 60A (70-200 micron).

### 1.2 Instrumental

All compounds were characterized by <sup>1</sup>H NMR, <sup>13</sup>C NMR as well as elemental analysis. Melting points were determined in open capillaries on a Veego electronic apparatus VMP-D (Veego Instrument Corporation, Mumbai, India) and are uncorrected. <sup>1</sup>H NMR and <sup>13</sup>C NMR spectra were recorded on a Bruker 400 MHz model spectrometer using DMSO-*d*<sub>6</sub> as a solvent and TMS as internal standard with <sup>1</sup>H resonant frequency of 400 MHz and <sup>13</sup>C resonant frequency of 100 MHz. The <sup>1</sup>H NMR, <sup>13</sup>C NMR chemical shifts were reported as parts per million (ppm) downfield from TMS (Me<sub>4</sub>Si). The splitting patterns are designated as follows; s, singlet; d, doublet; t, triplet; m, multiplet. Elemental analyses (C, H, N) were performed using a Heraeus Carlo Erba 1180 CHN analyzer (Hanau, Germany).

## 2. General procedure for Pd-catalyzed couplings of 2-Chloro-4,6-disubstituted-s-triazine with various ureas:

To an oven dried flat-bottomed flask which was equipped with a magnetic stir bar, was charged with ureas ( 1.0mmol), Cs<sub>2</sub>CO<sub>3</sub> ( 1.4 mmol), Xantphos (5 mol %), Pd<sub>2</sub>(dba)<sub>3</sub> ( 3.3 mol %), and 2-chloro-4, 6-disubstituted-s-triazine (1.0mmol) in 1,4-dioxane ( 5.0 mL). The reaction was sparged with nitrogen for 15 minutes, stirred and heated to 100 °C for 10 hours. The reaction mixture was cooled to room temperature and filtered through a pad of Celite eluting with ethyl acetate. The filtrate was concentrated and purification of the residue by silica gel column chromatography gave the desired product 3a–3t. Yield: 45-96 %.

| No. | Compounds                                                                           | Charecterization                                                                                                                                                                                                                                                                                                                                                                                                                                                                                                                                                                                             |
|-----|-------------------------------------------------------------------------------------|--------------------------------------------------------------------------------------------------------------------------------------------------------------------------------------------------------------------------------------------------------------------------------------------------------------------------------------------------------------------------------------------------------------------------------------------------------------------------------------------------------------------------------------------------------------------------------------------------------------|
| 3a  | 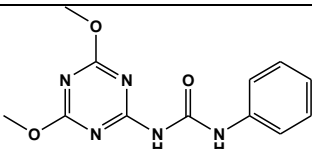 | <sup>1</sup> H NMR (400 MHz, DMSO- <i>d</i> <sub>6</sub> ) δ ppm : 9.72 (s, 1H), 8.95(s, 1H), 7.46 (d, <i>J</i> = 7.6 Hz, 2H), 7.30 (t, <i>J</i> = 7.6 Hz, 2H), 7.01 (t, <i>J</i> = 7.4 Hz, 1H), 3.85 (s, 6H). <sup>13</sup> C NMR (400 MHz, DMSO- <i>d</i> <sub>6</sub> ) δ ppm : 172.45, 168.55, 156.55, 141.08, 129.02, 121.45, 118.19, 56.52. <b>Anal. Calcd. For</b> C <sub>12</sub> H <sub>13</sub> N <sub>5</sub> O <sub>3</sub> : C, 52.36; H, 4.76; N, 25.44. <b>Found:</b> C, 52.18; H, 4.87; N, 25.29. <b>mp</b> 137°C.                                                                           |
| 3b  |  | <sup>1</sup> H NMR (400 MHz, DMSO- <i>d</i> <sub>6</sub> ) δ ppm : 9.75 (s, 1H), 9.05 (s, 1H), 8.10(td, <i>J</i> = 8.2, 2.0 Hz, 1H), 7.29 (m, 1H), 7.18 (t, <i>J</i> = 7.6, 1H), 7.07 (m, 1H), 3.86 (s, 6H). <sup>13</sup> C NMR (400 MHz, DMSO- <i>d</i> <sub>6</sub> ) δ ppm : 172.49, 168.69, 155.49- 155.31 (m), 152.97, 130.09 (d, <i>J</i> = 8.4 Hz), 128.99 (d, <i>J</i> = 19.8 Hz), 125.95 (d, <i>J</i> = 2.9 Hz), 122.71 (d, <i>J</i> = 7.6 Hz), 121.86 (d, <i>J</i> = 19.8 Hz), 56.57. <b>Anal. Calcd. For</b> C <sub>12</sub> H <sub>12</sub> N <sub>5</sub> O <sub>3</sub> F: C, 49.15; H, 4.12; |

|    |                                                                                     |                                                                                                                                                                                                                                                                                                                                                                                                                                                                                                                                                                                                                                                                                                                       |
|----|-------------------------------------------------------------------------------------|-----------------------------------------------------------------------------------------------------------------------------------------------------------------------------------------------------------------------------------------------------------------------------------------------------------------------------------------------------------------------------------------------------------------------------------------------------------------------------------------------------------------------------------------------------------------------------------------------------------------------------------------------------------------------------------------------------------------------|
|    |                                                                                     | N,6.48. <b>Found:</b> C, 49.25; H, 4.21; N, 6.41. <b>mp</b> 168-170°C.                                                                                                                                                                                                                                                                                                                                                                                                                                                                                                                                                                                                                                                |
| 3c | 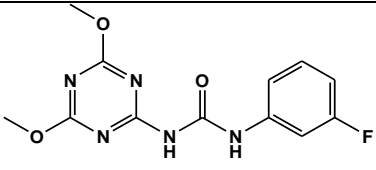   | <b><sup>1</sup>H NMR</b> (400 MHz, DMSO- <i>d</i> <sub>6</sub> ) δ ppm :9.74 (s, 1H), 9.09 (s, 1H), 7.87 (dt, <i>J</i> = 9.0, 2.0 Hz, 1H), 7.38 (td, <i>J</i> = 7.6, 5.8 Hz, 1H), 6.79 (ddt, <i>J</i> = 11.0, 7.8, 2.1 Hz, 2H), 3.86 (s, 6H). <b><sup>13</sup>C NMR</b> (400 MHz, DMSO- <i>d</i> <sub>6</sub> ) δ ppm : 172.47, 168.75, 164.03, 161.51, 156.35, 140.93 (d, <i>J</i> = 7.6 Hz),130.01(d, <i>J</i> = 7.6 Hz), 116.62 (d, <i>J</i> = 2.9 Hz), 111.48 (d, <i>J</i> = 19.8 Hz), 106.60 (d, <i>J</i> = 19.8 Hz), 56.60. <b>Anal. Calcd. For</b> C <sub>12</sub> H <sub>12</sub> N <sub>5</sub> O <sub>3</sub> F: C, 49.15; H, 4.12; N, 6.48. <b>Found:</b> C, 49.28; H, 4.17; N, 6.34. <b>mp</b> 175-176°C. |
| 3d |    | <b><sup>1</sup>H NMR</b> (400 MHz, DMSO- <i>d</i> <sub>6</sub> ) δ ppm : 9.70 (s, 1H), 9.04 (s, 1H), 7.48 (m, 2H), 7.09 (m, 2H), 3.84 (s, 6H). <b><sup>13</sup>C NMR</b> (400 MHz, DMSO- <i>d</i> <sub>6</sub> ) δ ppm : 172.51, 168.44, 161.51, 158.99, 156.63, 139.74(d, <i>J</i> = 2.9 Hz), 119.60 (d, <i>J</i> = 8.4 Hz), 114.55, 114.34, 56.50. <b>Anal. Calcd. For</b> C <sub>12</sub> H <sub>12</sub> N <sub>5</sub> O <sub>3</sub> F: C, 49.15; H, 4.12; N, 6.48. <b>Found:</b> C, 49.11; H, 4.24; N, 6.56. <b>mp</b> 193-194°C.                                                                                                                                                                              |
| 3e |  | <b><sup>1</sup>H NMR</b> (400 MHz, DMSO- <i>d</i> <sub>6</sub> ) δ ppm : 9.69 (s, 1H),8.97 (s, 1H), 7.21 (dd, <i>J</i> = 7.2, 2.1 Hz, 1H), 7.17-7.11 (m, 2H) 7.00 (dd, <i>J</i> = 7.8, 1.9 Hz, 1H). 3.87 (s, 6H). 3.65 (s, 3H). <b><sup>13</sup>C NMR</b> (400 MHz, DMSO- <i>d</i> <sub>6</sub> ) δ ppm : 172.37, 168.33, 156.60, 153.07, 129.41, 125.33, 124.19, 120.71, 113.78, 56.63, 57.02. . <b>Anal. Calcd.</b> For C <sub>13</sub> H <sub>15</sub> N <sub>5</sub> O <sub>4</sub> : C, 51.14; H, 4.95; N, 22.94. <b>Found:</b> C, 51.16; H, 4.98; N, 22.85. <b>mp</b> 147-149°C.                                                                                                                                |
| 3f |  | <b><sup>1</sup>H NMR</b> (400 MHz, DMSO- <i>d</i> <sub>6</sub> ) δ ppm : 9.67 (s, 1H), 9.00 (s, 1H), 6.95 (dd, <i>J</i> = 8.0, 2.0 Hz, 1H), 7.22 (t, <i>J</i> = 8.0 Hz, 1H), 6.75 (t, <i>J</i> = 2.0 Hz, 1H), 6.62 (dd, <i>J</i> = 8.0, 2.0 Hz, 1H) 3.86 (s, 6H). 3.68 (s, 3H). ). <b><sup>13</sup>C NMR</b> (400 MHz, DMSO- <i>d</i> <sub>6</sub> ) δ ppm : 172.39, 168.41, 159.17, 156.58, 141.29, 129.69, 116.33, 113.161, 107.45, 56.57,                                                                                                                                                                                                                                                                          |

|    |                                                                                     |                                                                                                                                                                                                                                                                                                                                                                                                                                                                                                                                                  |
|----|-------------------------------------------------------------------------------------|--------------------------------------------------------------------------------------------------------------------------------------------------------------------------------------------------------------------------------------------------------------------------------------------------------------------------------------------------------------------------------------------------------------------------------------------------------------------------------------------------------------------------------------------------|
|    |                                                                                     | 57.14. <b>Anal. Calcd.</b> For C <sub>13</sub> H <sub>15</sub> N <sub>5</sub> O <sub>4</sub> : C, 51.14; H, 4.95; N, 22.94. <b>Found:</b> C, 51.10; H, 4.99; N, 22.97. <b>mp</b> 142-143°C.                                                                                                                                                                                                                                                                                                                                                      |
| 3g | 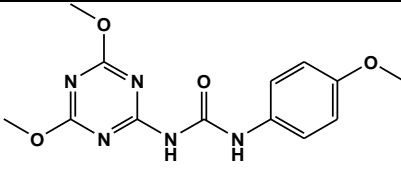   | <b><sup>1</sup>H NMR</b> (400 MHz, DMSO- <i>d</i> <sub>6</sub> ) δ ppm : 9.70 (s, 1H), 8.89 (s, 1H), 7.40 (d, <i>J</i> = 7.6 Hz, 2H), 6.79 (d, <i>J</i> = 7.6 Hz, 2H), 3.86 (s, 6H), 3.73 (s, 3H). <b><sup>13</sup>C NMR</b> (400 MHz, DMSO- <i>d</i> <sub>6</sub> ) δ ppm : 172.44, 168.50, 159.97, 156.68, 137.53, 119.54, 114.36, 56.56, 56.89. <b>Anal. Calcd.</b> For C <sub>13</sub> H <sub>15</sub> N <sub>5</sub> O <sub>4</sub> : C, 51.14; H, 4.95; N, 22.94. <b>Found:</b> C, 51.24; H, 4.89; N, 22.90. <b>mp</b> 157°C.              |
| 3h |    | <b><sup>1</sup>H NMR</b> (400 MHz, DMSO- <i>d</i> <sub>6</sub> ) δ ppm : 9.77 (s, 1H), 9.11 (s, 1H), 8.20 (d, <i>J</i> = 8.6 Hz, 2H), 7.69 (d, <i>J</i> = 8.6 Hz, 2H), 3.85 (s, 6H). <b><sup>13</sup>C NMR</b> (400 MHz, DMSO- <i>d</i> <sub>6</sub> ) δ ppm : 172.53, 168.66, 156.71, 142.44, 133.30, 119.13, 119.01, 107.68, 56.22. <b>Anal. Calcd.</b> For C <sub>13</sub> H <sub>12</sub> N <sub>6</sub> O <sub>3</sub> : C, 52.00; H, 4.03; N, 27.99. <b>Found:</b> C, 52.09; H, 4.00; N, 27.94. <b>mp</b> 154°C.                           |
| 3i |  | <b><sup>1</sup>H NMR</b> (400 MHz, DMSO- <i>d</i> <sub>6</sub> ) δ ppm : 9.71 (s, 1H), 8.97 (s, 1H), 7.33 (d, <i>J</i> = 7.8 Hz, 2H), 7.07 (d, <i>J</i> = 7.8, 2H), 3.84 (s, 6H), 2.34 (s, 3H). <b><sup>13</sup>C NMR</b> (400 MHz, DMSO- <i>d</i> <sub>6</sub> ) δ ppm : 172.41, 168.30, 156.63, 139.91, 137.54, 128.74, 118.98, 56.32, 22.01. <b>Anal. Calcd.</b> For C <sub>13</sub> H <sub>15</sub> N <sub>5</sub> O <sub>3</sub> : C, 53.97; H, 5.23; N, 24.21. <b>Found:</b> C, 53.93; H, 5.26; N, 24.16. <b>mp</b> 124-126°C.             |
| 3j |  | <b><sup>1</sup>H NMR</b> (400 MHz, DMSO- <i>d</i> <sub>6</sub> ) δ ppm : 9.76 (s, 1H), 9.06 (s, 1H), 7.89 (d, <i>J</i> = 8.8 Hz, 2H), 7.55 (d, <i>J</i> = 8.8 Hz, 2H), 3.85 (s, 6H). <b><sup>13</sup>C NMR</b> (400 MHz, DMSO- <i>d</i> <sub>6</sub> ) δ ppm : 172.57, 168.80, 156.79, 143.44, 132.49, 132.17, 126.75 (m), 124.00, 119.69 (d, <i>J</i> = 2.2 Hz), 56.47. <b>Anal. Calcd.</b> For C <sub>13</sub> H <sub>12</sub> N <sub>5</sub> O <sub>3</sub> F <sub>3</sub> : C, 45.49; H, 3.52; N, 16.60. <b>Found:</b> C, 45.60; H, 3.46; N, |

|    |                                                                                     |                                                                                                                                                                                                                                                                                                                                                                                                                                                                                                                                          |
|----|-------------------------------------------------------------------------------------|------------------------------------------------------------------------------------------------------------------------------------------------------------------------------------------------------------------------------------------------------------------------------------------------------------------------------------------------------------------------------------------------------------------------------------------------------------------------------------------------------------------------------------------|
|    |                                                                                     | 16.67.mp205°C.                                                                                                                                                                                                                                                                                                                                                                                                                                                                                                                           |
| 3k | 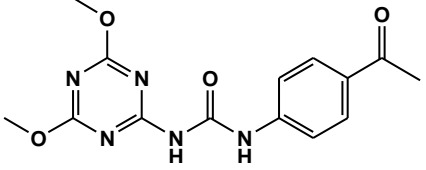   | <sup>1</sup> H NMR (400 MHz, DMSO- <i>d</i> <sub>6</sub> ) δ ppm :9.79 (s, 1H), 9.08(s, 1H), 7.94 (d, 8.2 Hz, 2H), 7.85 (d, 8.2 Hz, 2H), 3.88 (s, 6H), 2.60 (s, 3H). <sup>13</sup> C NMR (400 MHz, DMSO- <i>d</i> <sub>6</sub> ) δ ppm : 197.93, 172.50, 168.61, 156.70, 141.54, 135.58, 128.76, 118.61, 56.44, 25.75. <b>Anal. Calcd.</b> For C <sub>14</sub> H <sub>15</sub> N <sub>5</sub> O <sub>4</sub> : C, 52.99; H, 4.76; N, 22.07. <b>Found:</b> C, 52.95; H, 4.79; N, 22.03. mp 184-186°C.                                     |
| 3l |    | <sup>1</sup> H NMR (400 MHz, DMSO- <i>d</i> <sub>6</sub> ) δ ppm : 9.95(s, 1H), 9.77 (s, 1H), 9.05 (s, 1H), 7.73 (d, <i>J</i> = 7.8 Hz, 2H), 7.58 (d, <i>J</i> = 7.8 Hz, 2H), 3.87 (s, 6H), 2.11 (s, 3H). <sup>13</sup> C NMR (400 MHz, DMSO- <i>d</i> <sub>6</sub> ) δ ppm : 172.40, 170.04, 168.44, 156.50, 139.00, 137.87, 119.13, 119.01, 56.55, 23.51. <b>Anal. Calcd.</b> For C <sub>14</sub> H <sub>16</sub> N <sub>6</sub> O <sub>4</sub> : C, 50.60; H, 4.85; N, 25.29. <b>Found:</b> C, 50.67; H, 4.80; N, 25.42.mp 199-201°C. |
| 3m |  | <sup>1</sup> H NMR (400 MHz, DMSO- <i>d</i> <sub>6</sub> ) δ ppm : 9.66 (s, 1H), 8.90 (s, 1H), 7.50 (d, <i>J</i> = 7.6 Hz, 2H), 6.90 (d, <i>J</i> = 7.6 Hz, 2H), 3.84 (s, 6H), 3.72 (t, 4H), 3.24 (t, 4H). <sup>13</sup> C NMR (400 MHz, DMSO- <i>d</i> <sub>6</sub> ) δ ppm : 172.37, 168.27, 156.47, 151.75, 136.00, 120.56, 118.39, 67.01, 56.29, 49.79. <b>Anal. Calcd.</b> For C <sub>16</sub> H <sub>20</sub> N <sub>6</sub> O <sub>4</sub> : C, 53.33; H, 5.59; N, 23.32. <b>Found:</b> C, 53.44; H, 5.48; N, 23.43mp 180-182°C.  |
| 3n |  | <sup>1</sup> H NMR (400 MHz, DMSO- <i>d</i> <sub>6</sub> ) δ ppm : 9.69 (s, 1H), 7.96 (s, 1H), 7.30-7.16 (m, 5H), 4.33 (s, 2H), 3.74 (s, 6H). <sup>13</sup> C NMR (400 MHz, DMSO- <i>d</i> <sub>6</sub> ) δ ppm : 172.26, 163.10, 155.53, 141.17, 128.373, 128.19, 126.72, 45.01, 57.00. <b>Anal. Calcd.</b> For C <sub>13</sub> H <sub>15</sub> N <sub>5</sub> O <sub>3</sub> : C, 53.97; H, 5.23; N, 24.21. <b>Found:</b> C, 53.93; H, 5.28; N, 24.29.mp 114-115°C.                                                                    |

|    |                                                                                     |                                                                                                                                                                                                                                                                                                                                                                                                                                                                                                                                                                                                         |
|----|-------------------------------------------------------------------------------------|---------------------------------------------------------------------------------------------------------------------------------------------------------------------------------------------------------------------------------------------------------------------------------------------------------------------------------------------------------------------------------------------------------------------------------------------------------------------------------------------------------------------------------------------------------------------------------------------------------|
| 3o | 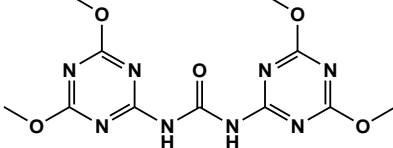   | <p><b><sup>1</sup>H NMR</b> (400 MHz, DMSO-<i>d</i><sub>6</sub>) δ ppm : 9.85 (s, 2H), 3.90 (s, 12H). <b><sup>13</sup>C NMR</b> (400 MHz, DMSO-<i>d</i><sub>6</sub>) δ ppm : 173.00, 169.06, 156.88, 56.15. <b>Anal. Calcd.</b> For C<sub>11</sub>H<sub>14</sub>N<sub>8</sub>O<sub>5</sub>: C, 39.06; H, 4.17; N, 33.12. <b>Found:</b> C, 39.01; H, 4.20; N, 33.38. <b>mp</b> 230°C.</p>                                                                                                                                                                                                                |
| 3p |    | <p><b><sup>1</sup>H NMR</b> (400 MHz, DMSO-<i>d</i><sub>6</sub>) δ ppm : 4.19 (m, 4H), 3.89 (s, 12H). <b><sup>13</sup>C NMR</b> (400 MHz, DMSO-<i>d</i><sub>6</sub>) δ ppm : 173.02, 168.89, 156.82, 56.23, 42.68. <b>Anal. Calcd.</b> For C<sub>13</sub>H<sub>16</sub>N<sub>8</sub>O<sub>5</sub>: C, 42.86; H, 4.43; N, 30.76. <b>Found:</b> C, 42.95; H, 4.42; N, 30.79. <b>mp</b> 216°C.</p>                                                                                                                                                                                                         |
| 3q |    | <p><b><sup>1</sup>H NMR</b> (400 MHz, DMSO-<i>d</i><sub>6</sub>) δ ppm : 9.55 (s, 1H), 8.73 (s, 1H), 7.42 (d, <i>J</i> = 7.8 Hz, 2H), 7.25 (t, <i>J</i> = 7.7 Hz, 2H), 7.00 (t, <i>J</i> = 7.3 Hz, 1H), 3.01 (s, 12H). <b><sup>13</sup>C NMR</b> (400 MHz, DMSO-<i>d</i><sub>6</sub>) δ ppm : 166.71, 163.57, 160.07, 139.82, 128.60, 125.17, 120.03, 36.90. <b>Anal. Calcd.</b> For C<sub>14</sub>H<sub>19</sub>N<sub>7</sub>O: C, 55.80; H, 6.36; N, 32.54. <b>Found:</b> C, 55.68; H, 6.37; N, 32.59. <b>mp</b> 132°C.</p>                                                                           |
| 3r |  | <p><b><sup>1</sup>H NMR</b> (400 MHz, DMSO-<i>d</i><sub>6</sub>) δ ppm : 9.67 (s, 1H), 8.79 (s, 1H), 7.43 (d, <i>J</i> = 8.0 Hz, 2H), 7.28 (t, <i>J</i> = 8.0 Hz, 2H), 7.01 (t, <i>J</i> = 7.9 Hz, 1H), 4.32 (q, <i>J</i> = 6.0 Hz, 4H), 1.30 (t, <i>J</i> = 6.0 Hz, 6H). <b><sup>13</sup>C NMR</b> (400 MHz, DMSO-<i>d</i><sub>6</sub>) δ ppm : 171.65, 164.59, 160.30, 139.81, 128.76, 125.08, 119.98, 60.49, 15.01. <b>Anal. Calcd.</b> For C<sub>14</sub>H<sub>17</sub>N<sub>5</sub>O<sub>3</sub>: C, 55.44; H, 5.65; N, 23.09. <b>Found:</b> C, 55.37; H, 5.70; N, 23.06. <b>mp</b> 139-140°C.</p> |
| 3s |  | <p><b><sup>1</sup>H NMR</b> (400 MHz, DMSO-<i>d</i><sub>6</sub>) δ ppm : 9.70 (s, 1H), 8.93 (s, 1H), 7.45 (d, <i>J</i> = 7.7 Hz, 2H), 7.30 (t, <i>J</i> = 7.6 Hz, 2H), 7.03 (t, <i>J</i> = 7.3 Hz, 1H), 3.94 (s, 3H), 3.10 (s, 6H). <b><sup>13</sup>C NMR</b> (400 MHz, DMSO-<i>d</i><sub>6</sub>) δ ppm : 168.47, 167.42, 162.62, 160.30, 139.89, 128.60, 125.19, 120.04, 55.57, 36.69. <b>Anal. Calcd.</b> For C<sub>13</sub>H<sub>16</sub>N<sub>6</sub>O<sub>2</sub>: C, 54.16; H, 5.59; N, 29.15. <b>Found:</b> C, 54.25; H, 5.63; N,</p>                                                           |

|    |                                                                                                                                              |                                                                                                                                                                                                                                                                                                                                                                                                                                                                                                                                                                                                                                                                        |
|----|----------------------------------------------------------------------------------------------------------------------------------------------|------------------------------------------------------------------------------------------------------------------------------------------------------------------------------------------------------------------------------------------------------------------------------------------------------------------------------------------------------------------------------------------------------------------------------------------------------------------------------------------------------------------------------------------------------------------------------------------------------------------------------------------------------------------------|
|    |                                                                                                                                              | 29.11.mp 149-150°C.                                                                                                                                                                                                                                                                                                                                                                                                                                                                                                                                                                                                                                                    |
| 3t | 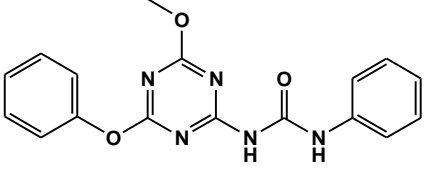<br><chem>COC1=CC=C(OC)N=C2N(C(=O)Nc3ccccc3)N=CN=C12</chem> | <sup>1</sup> H NMR (400 MHz, DMSO- <i>d</i> <sub>6</sub> ) δ ppm : 9.48 (s, 1H), 8.75 (s, 1H), 7.48 (dd, <i>J</i> = 7.6, 1.9 Hz, 2H), 7.31 (dt, <i>J</i> = 7.5 Hz, 4H), 7.19 (dd, <i>J</i> = 7.6, 2.0 Hz, 2H), 7.10 (tt, <i>J</i> = 7.6, 2.1 Hz, 1H), 6.89 (tt, <i>J</i> = 7.6, 2.0 Hz, 1H), 3.89 (s, 3H). <sup>13</sup> C NMR (400 MHz, DMSO- <i>d</i> <sub>6</sub> ) δ ppm : 174.19, 172.60, 163.02, 161.00, 149.97, 139.94, 133.33, 127.06, 128.11, 122.14, 125.25, 120.00, 56.00. <b>Anal.</b> <b>Calcd.</b> For C <sub>17</sub> H <sub>15</sub> N <sub>5</sub> O <sub>3</sub> : C, 60.53; H, 4.48; N, 20.76. Found: C, 60.51; H, 4.43; N, 20.80. <b>mp</b> 210°C. |

## References

- [1] F. Kurzer, *Org. Synth, Coll. Vol.* 1963, **4**, 49.
- [2] J. R. Dudley, J. T. Thurston, F. C. Schaefer, *J. Am. Chem. Soc.* 1950, **73**, 2986-2989.
- [3] W. Pearlmaan, C. K. Banks., *J. Am. Chem. Soc.* 1948, **70**, 3726-3728.
- [4] F.C. Schaefer, J. R. Thurston, J.R. Dudley., *J. Am. Chem. Soc.*, 1951, **73**, 2990-2992.



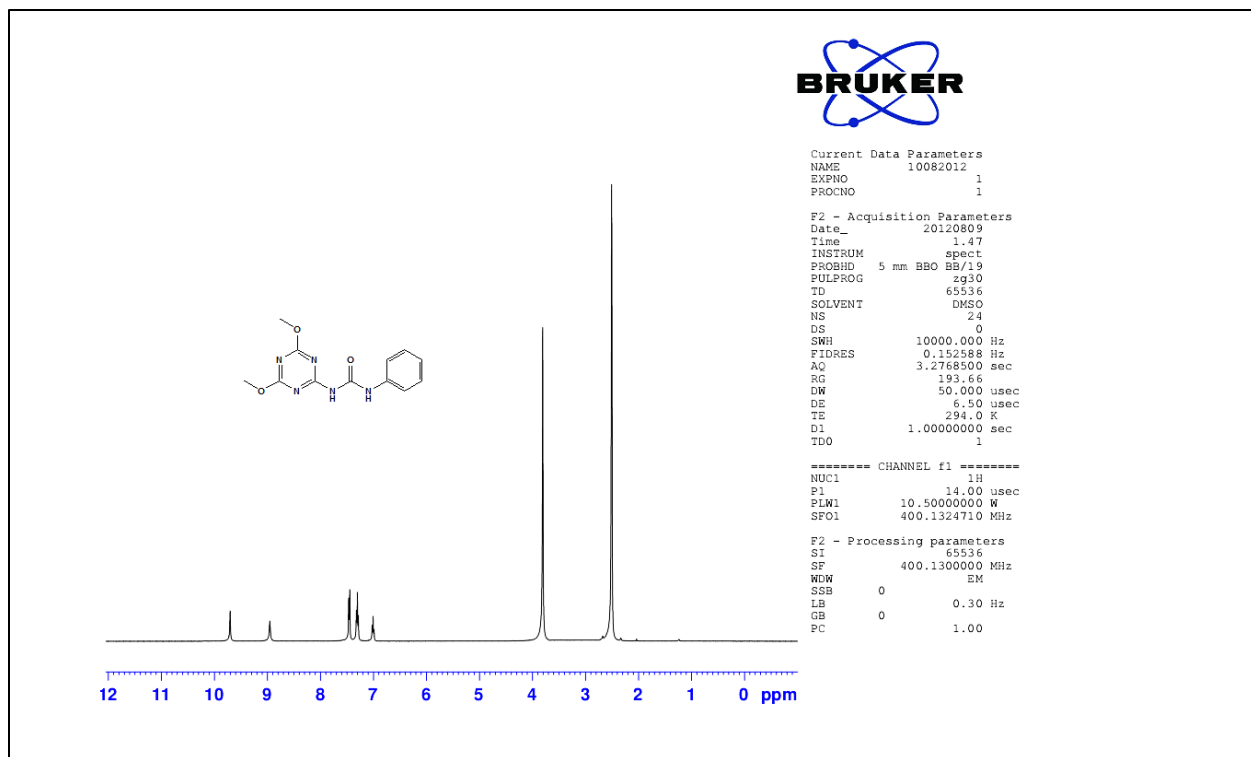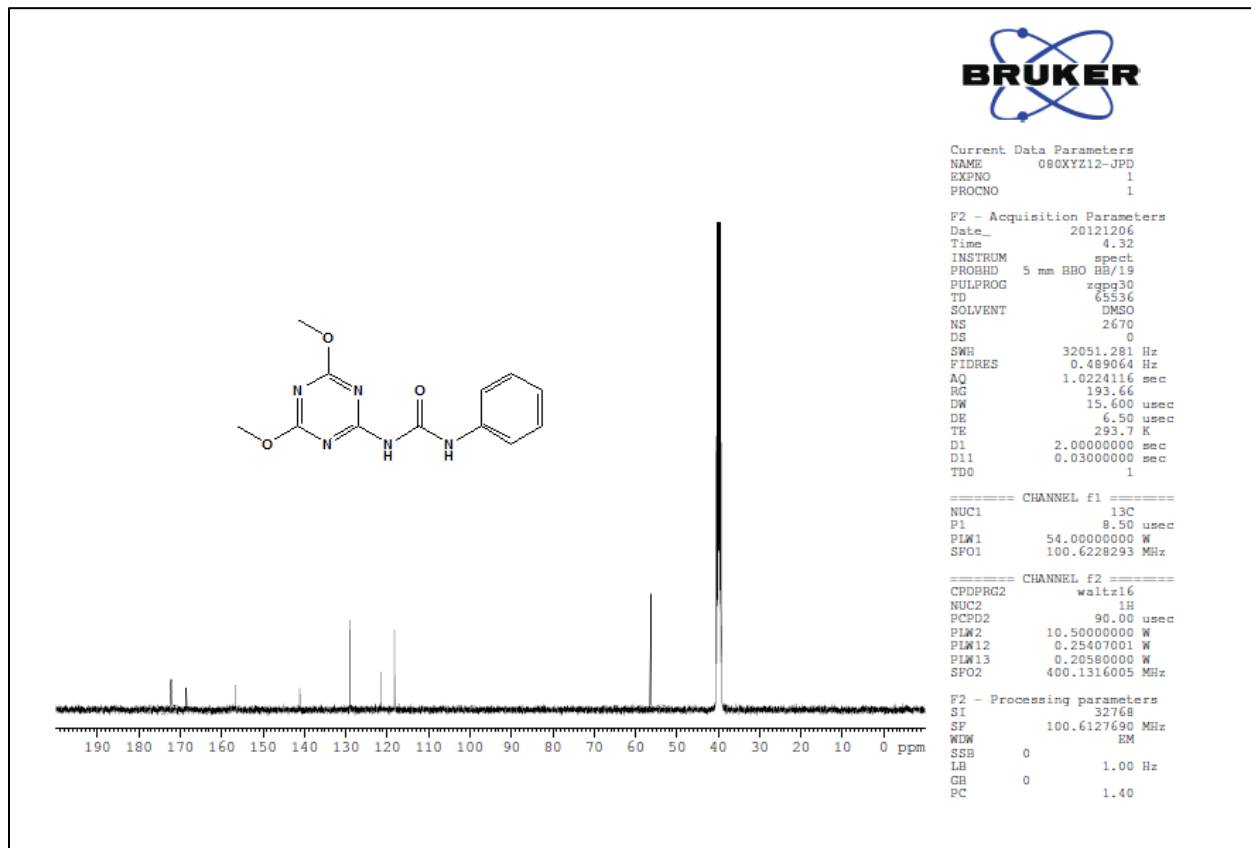

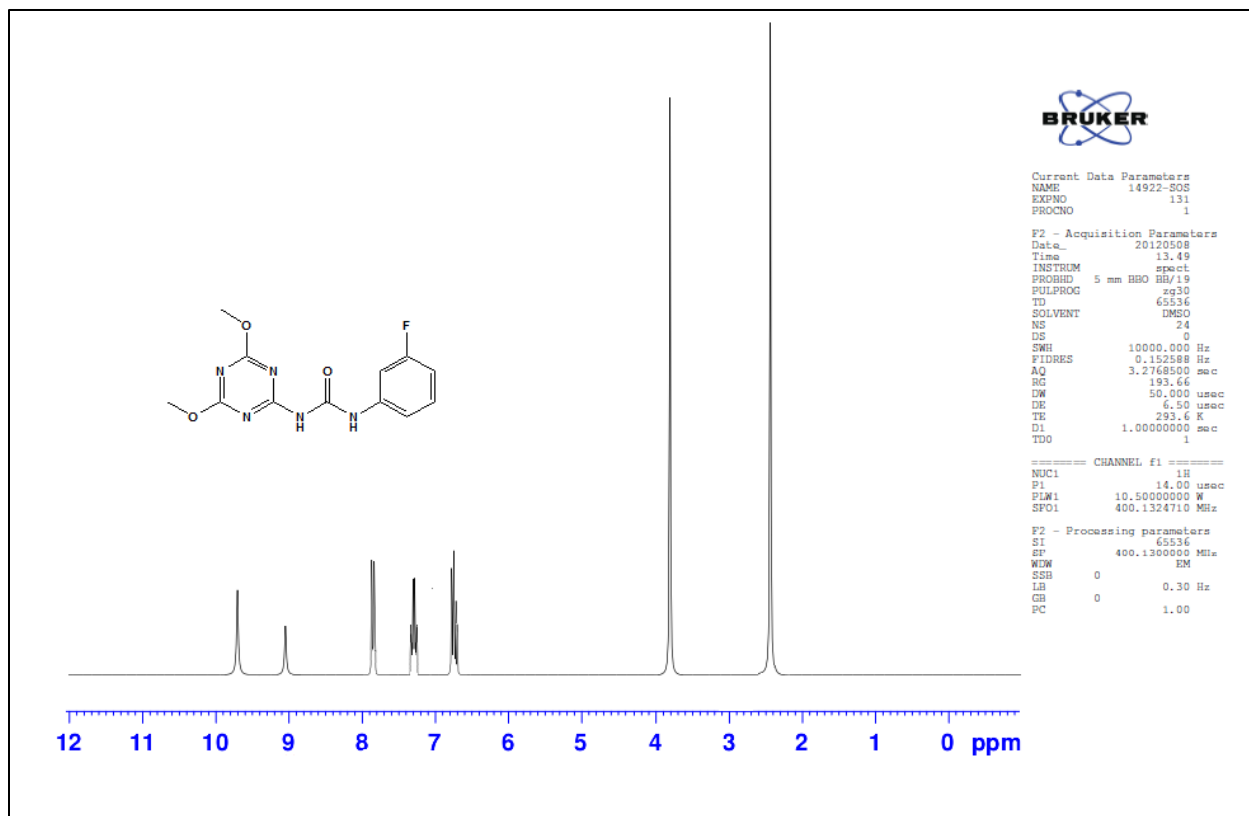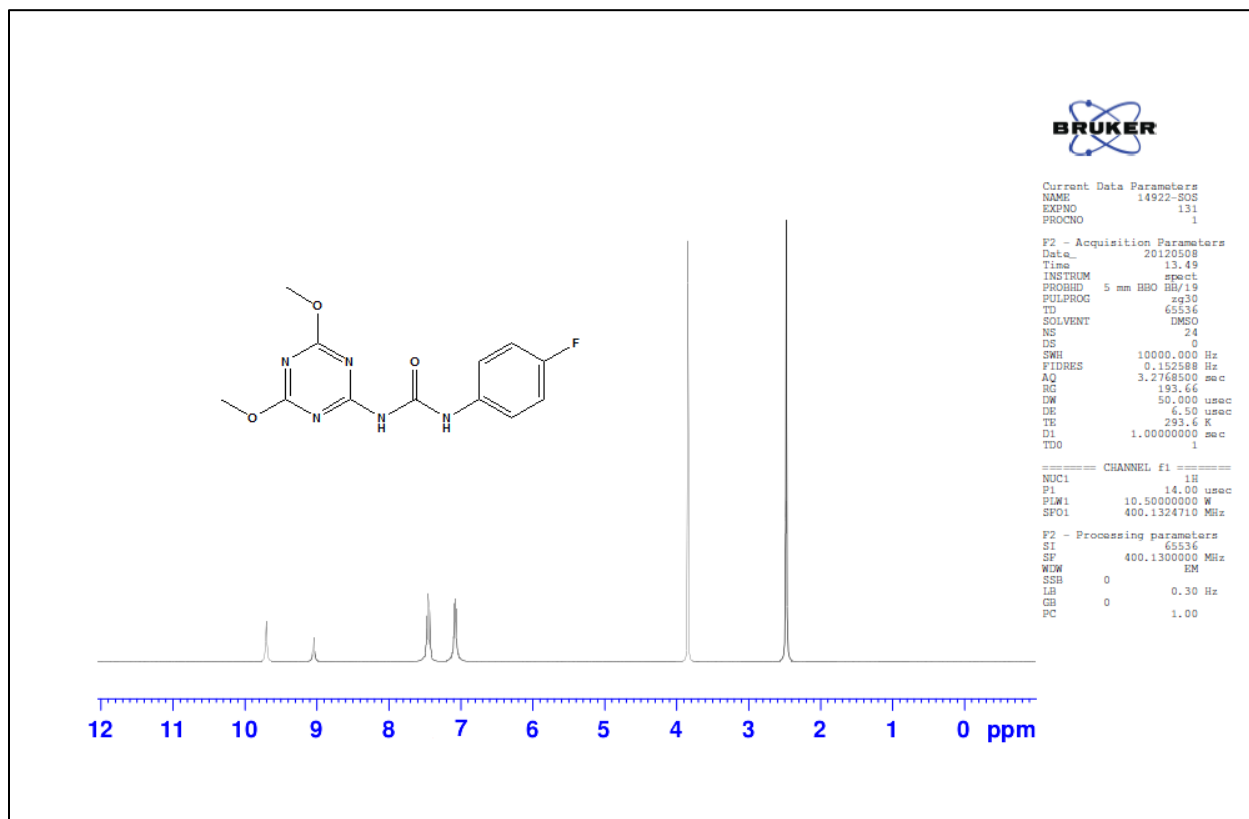

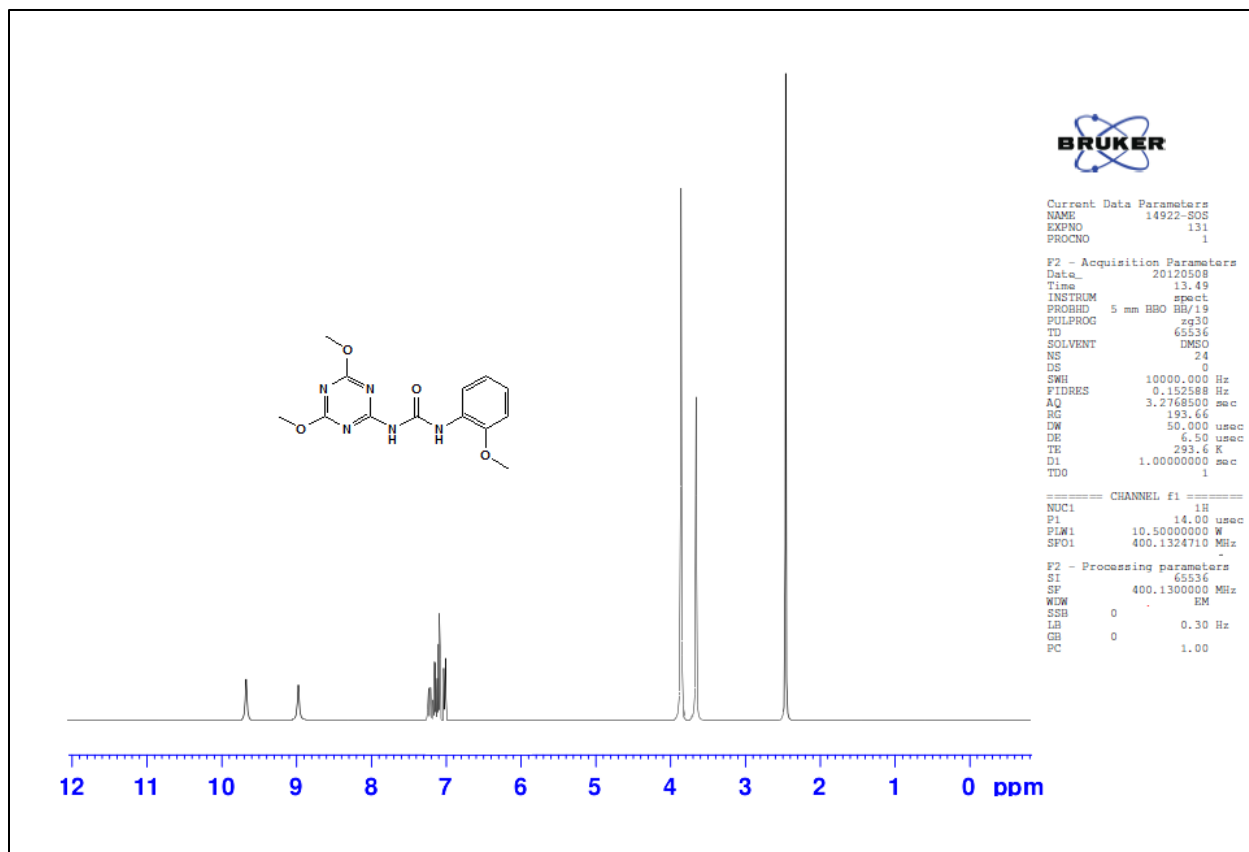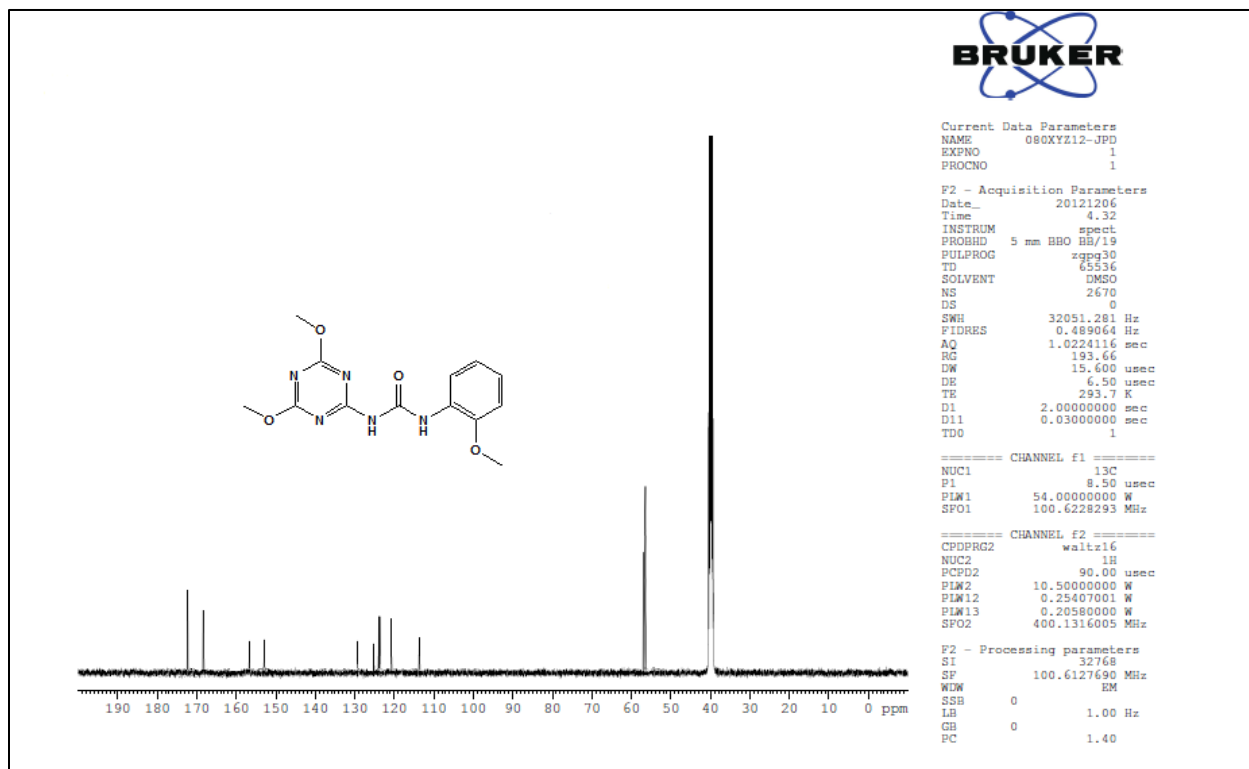

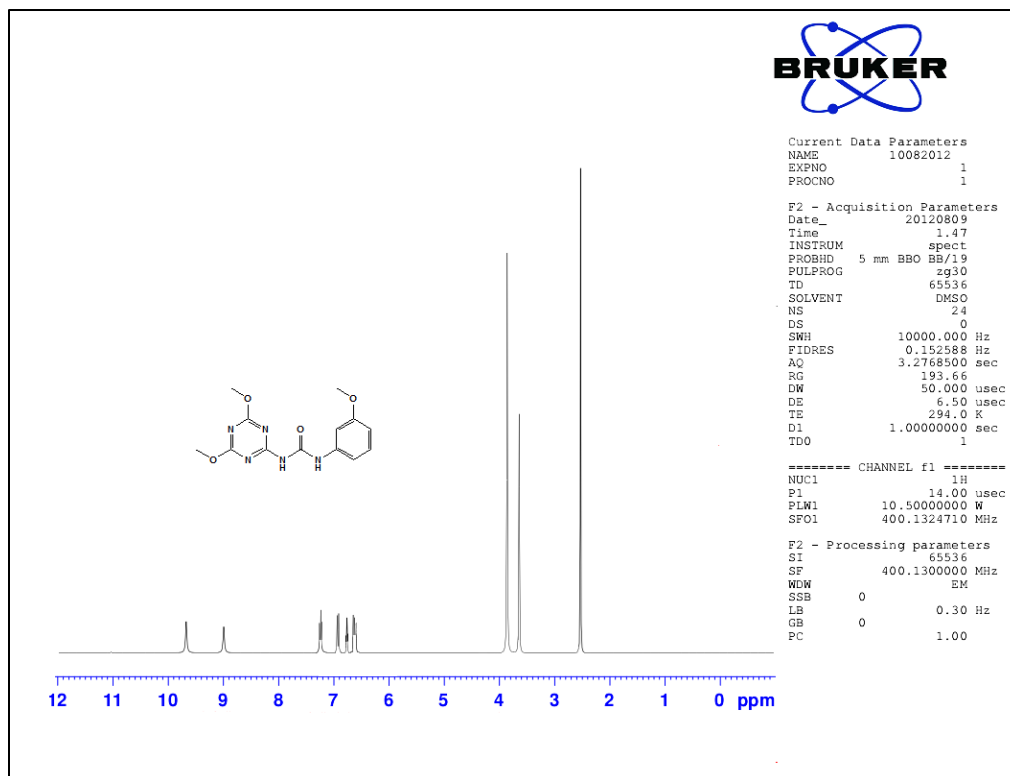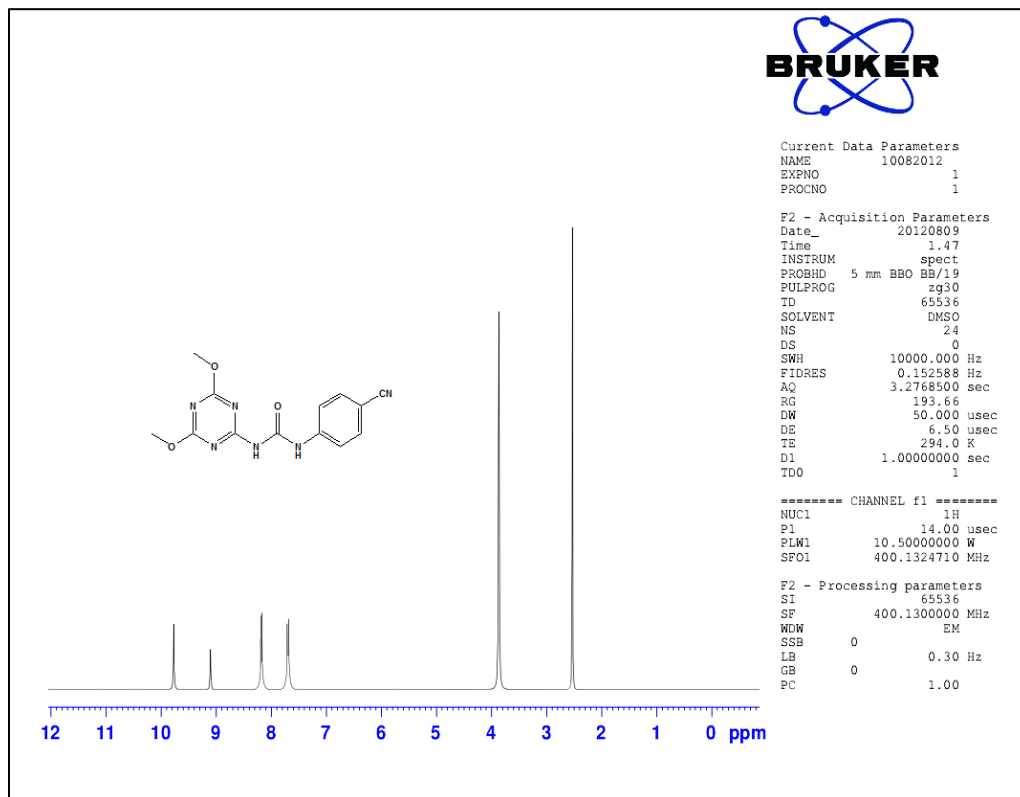

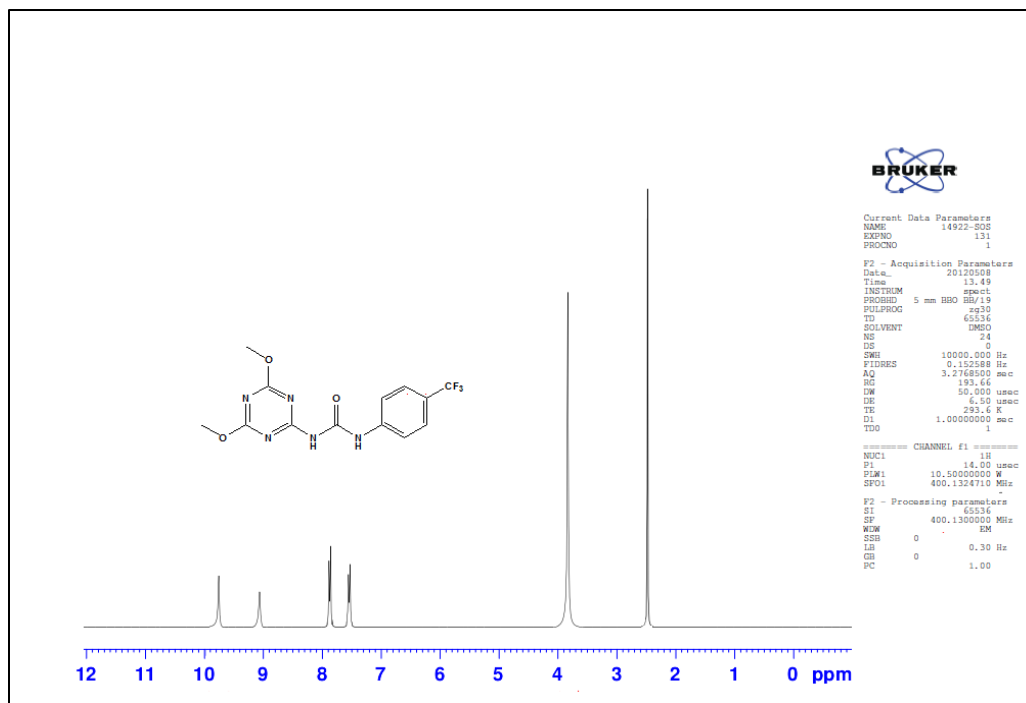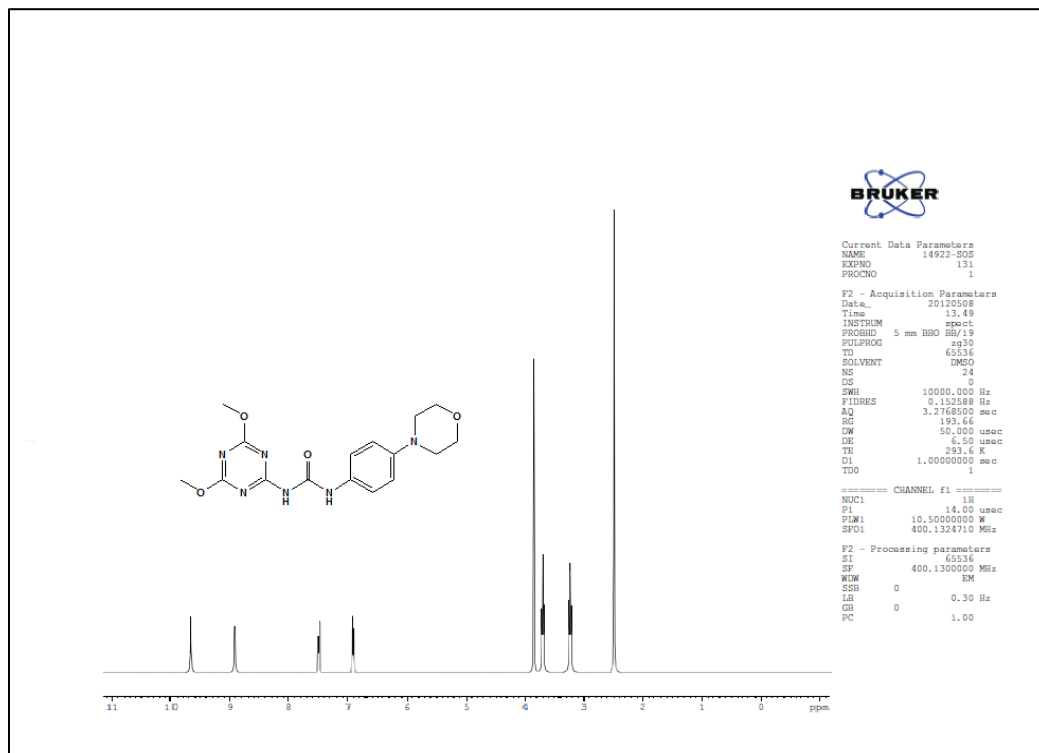

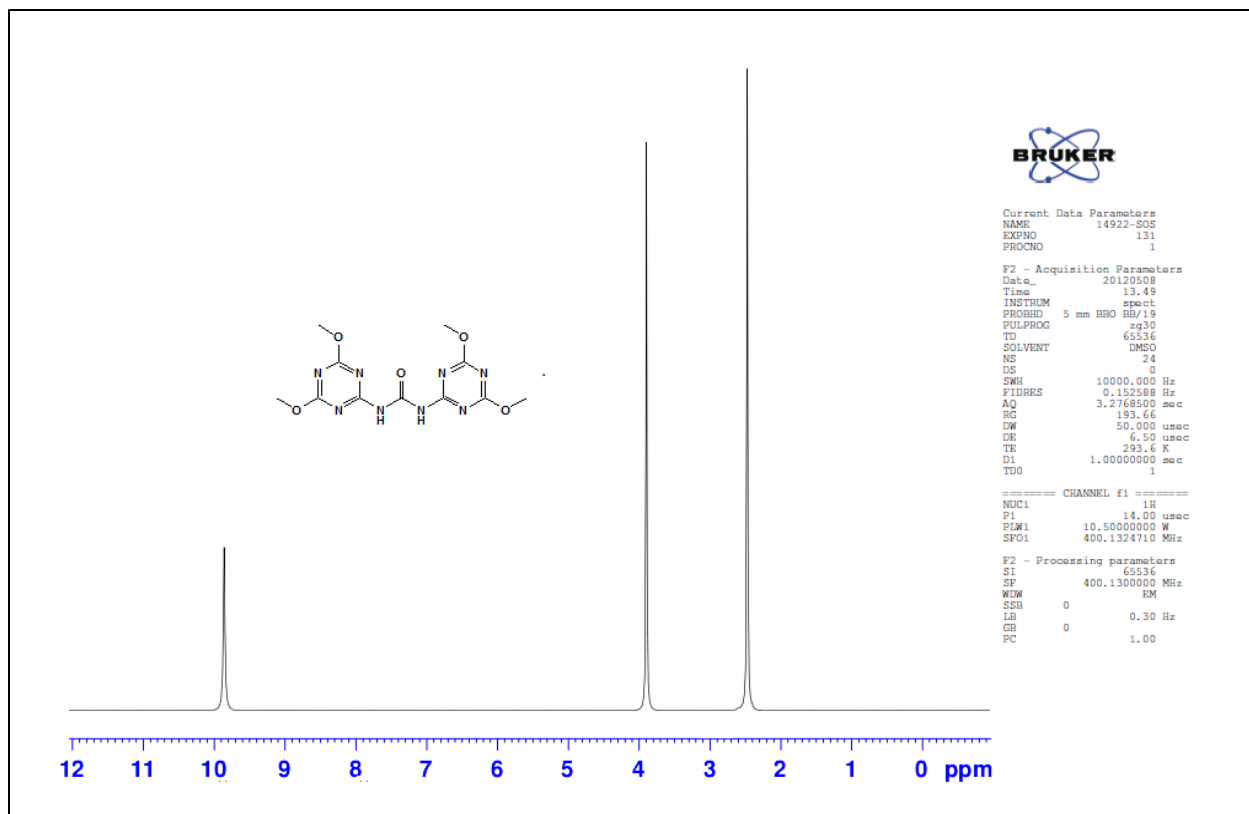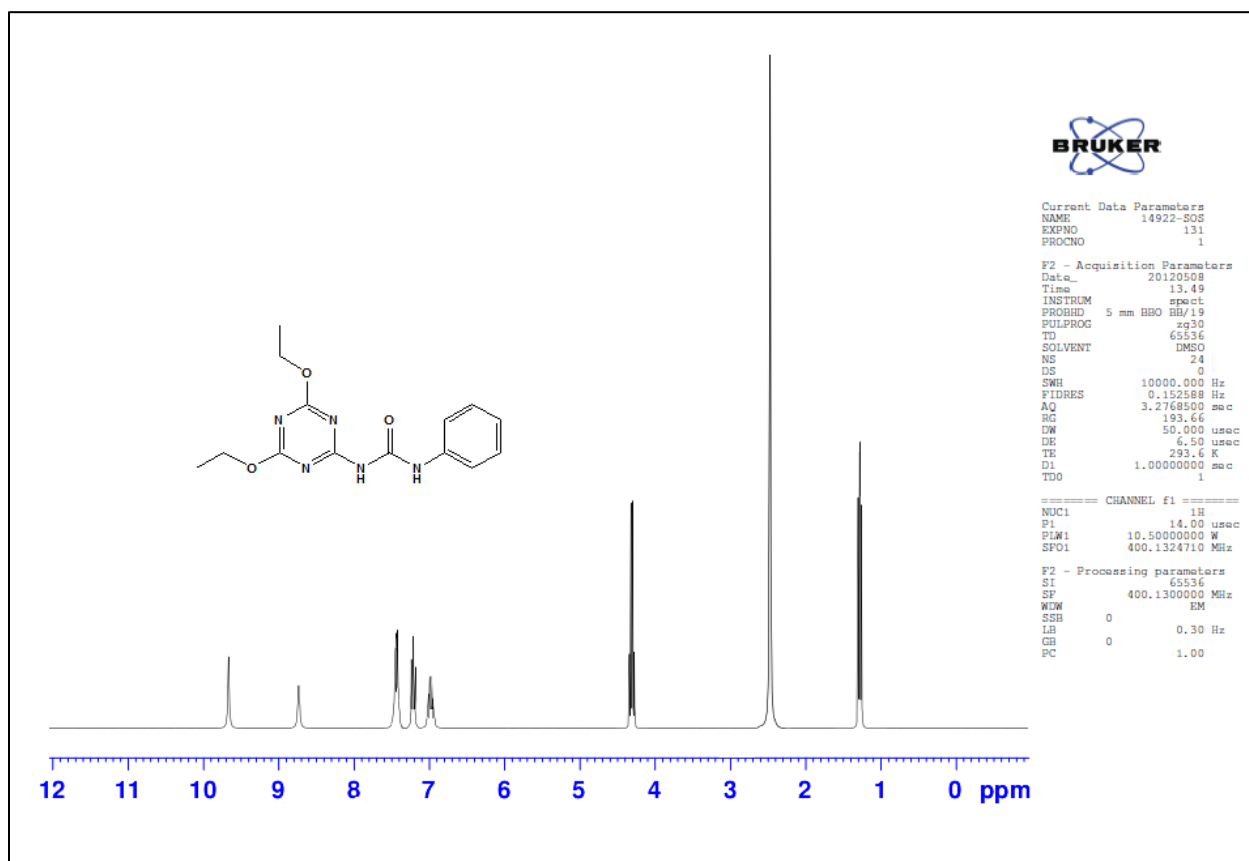

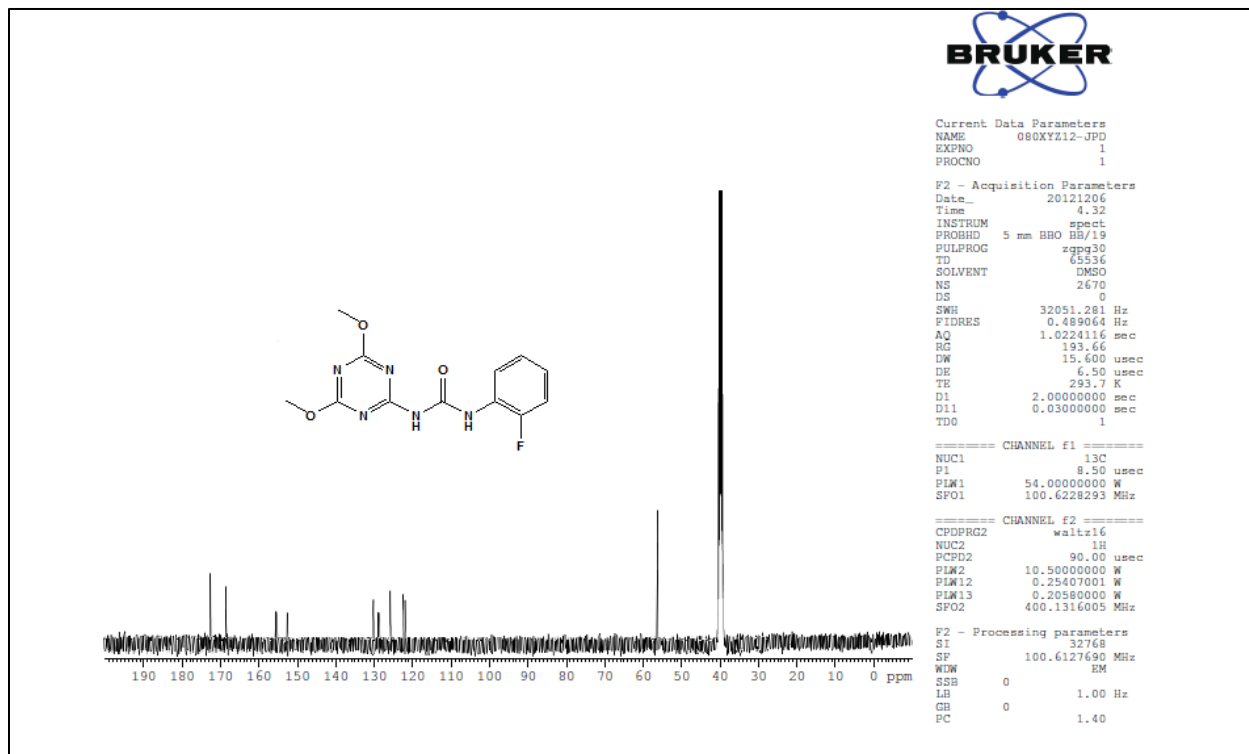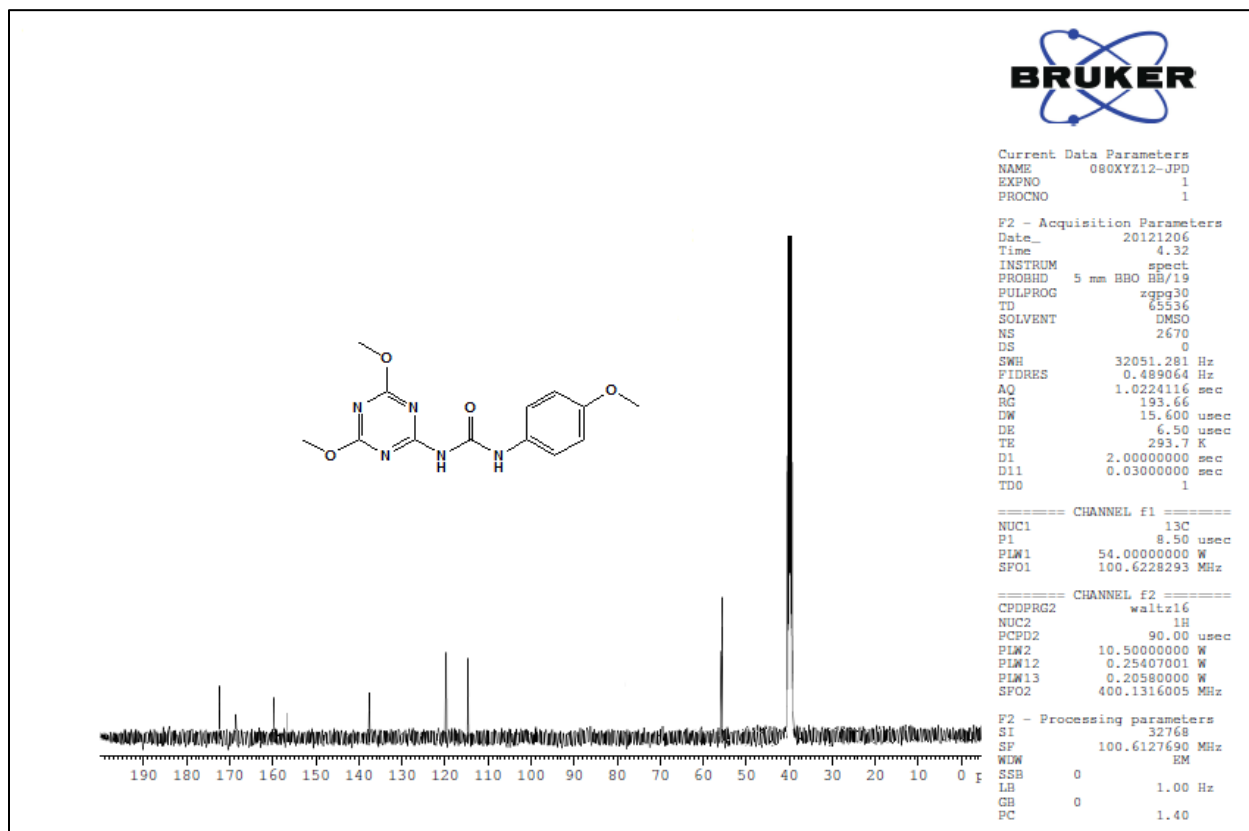

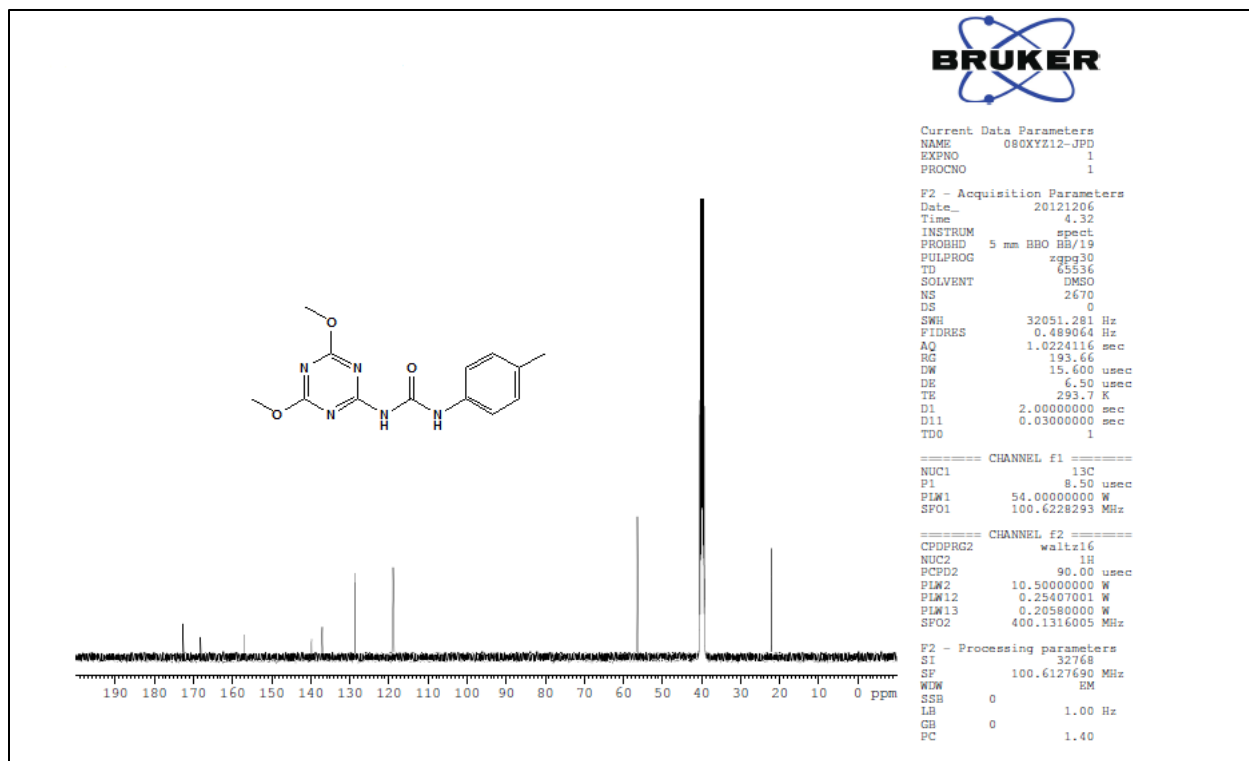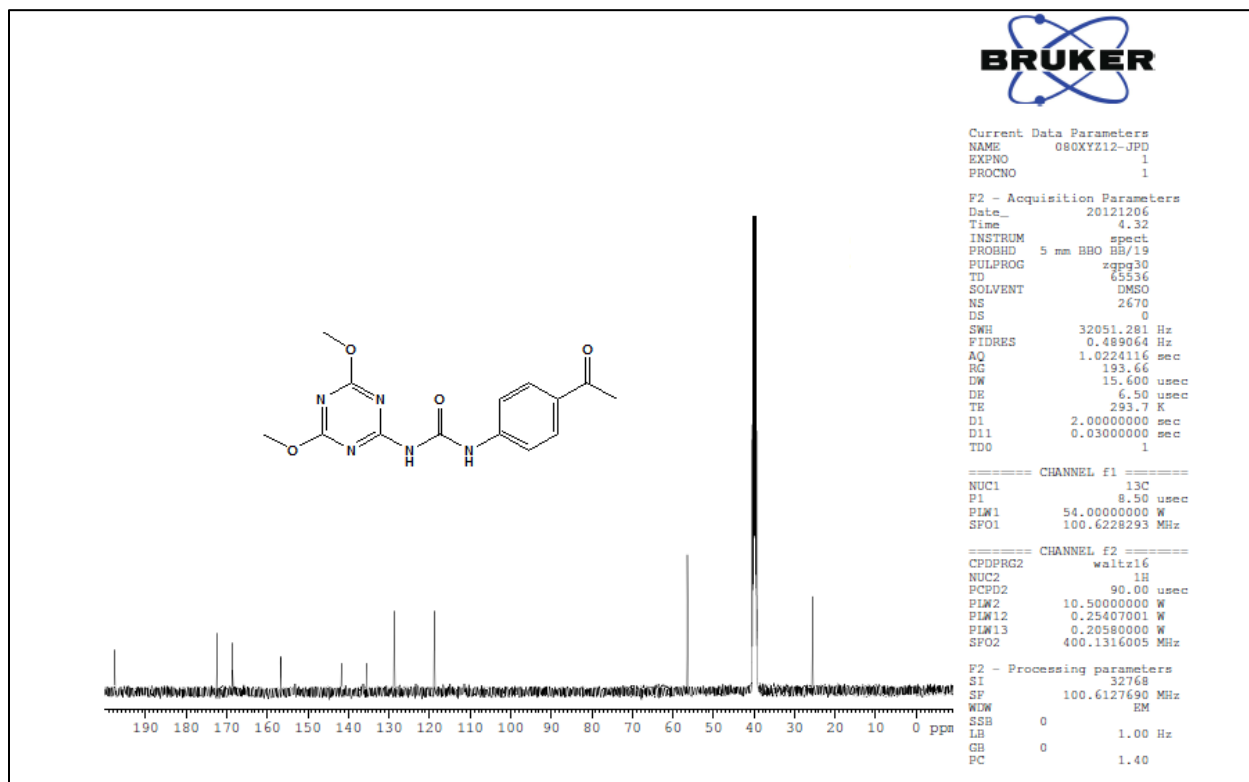



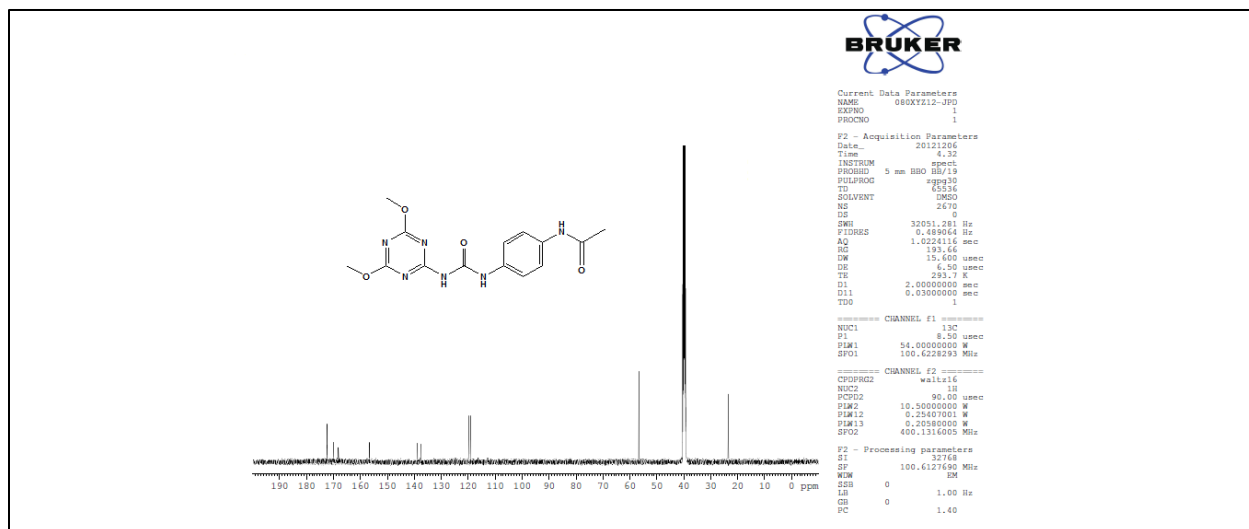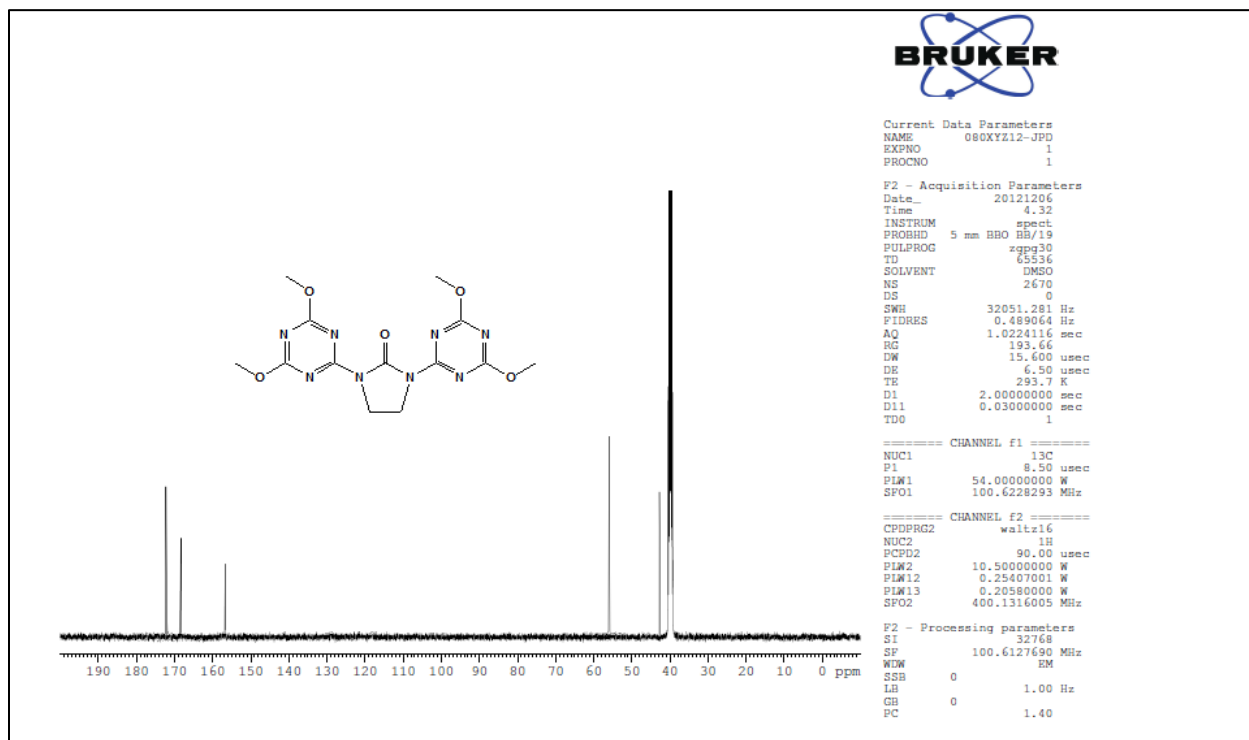

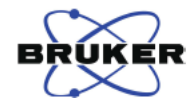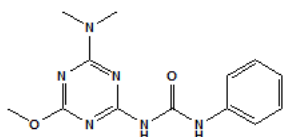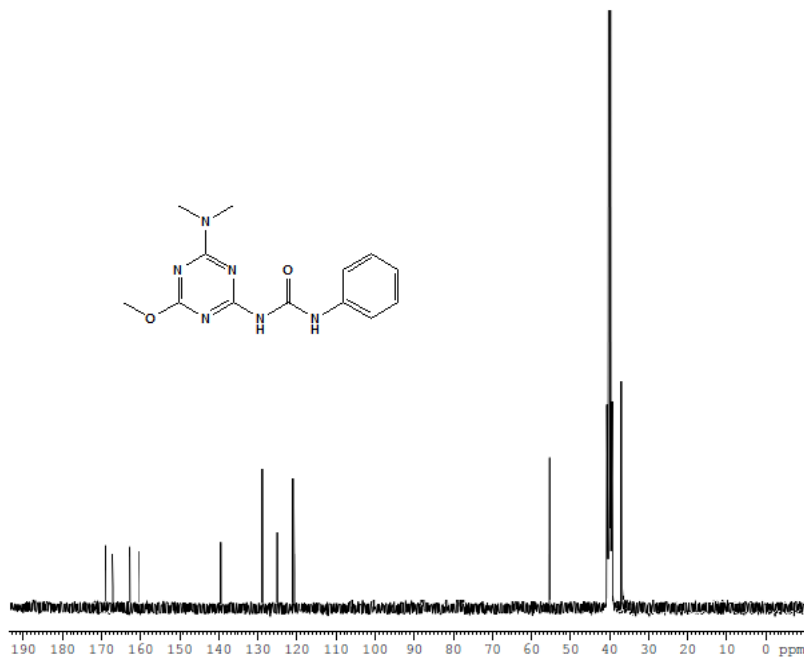

Current Data Parameters  
NAME 080XYZ12-JPD  
EXPNO 1  
PROCNO 1

F2 - Acquisition Parameters  
Date\_ 20121206  
Time 4.32  
INSTRUM spect  
PROBHD 5 mm BBO BB/19  
PULPROG zgpg30  
TD 65536  
SOLVENT DMSO  
NS 2670  
DS 0  
SWH 32051.281 Hz  
FIDRES 0.489064 Hz  
AQ 1.0224116 sec  
RG 193.66  
DW 15.600 usec  
DE 6.50 usec  
TE 293.7 K  
D1 2.0000000 sec  
D11 0.0300000 sec  
TDO 1

===== CHANNEL f1 =====  
NUC1 13C  
P1 8.50 usec  
PLW1 54.0000000 W  
SFO1 100.6228293 MHz

===== CHANNEL f2 =====  
CPDPRG2 waltz16  
NUC2 1H  
PCPD2 90.00 usec  
PLW2 10.50000000 W  
PLW12 0.25407001 W  
PLW13 0.20580000 W  
SFO2 400.1316005 MHz

F2 - Processing parameters  
SI 32768  
SF 100.6127690 MHz  
WDW EM  
SSB 0  
LB 1.00 Hz  
GB 0  
PC 1.40
